# Supplementary material for: Optical Genome Mapping Reveals the Complex Genetic Landscape of Myeloma
Source: Cancers (Basel). 2023 Sep 22;15(19):4687. doi: 10.3390/cancers15194687 (PMC10571866; doi:10.3390/cancers15194687)
Supplement: Supplementary file 1 [file cancers-15-04687-s001.zip › TableS1_BEDfile_CancerGeneList.xlsx]

## Sheet: CancerGeneList
Chromosome	Start Position	End Position	Gene
1	2050411	2185395	PRKCZ
1	3069168	3438621	PRDM16
1	11106535	11262556	MTOR
1	11658918	11691811	MAD2L2
1	18630846	18748866	PAX7
1	26693236	26782104	ARID1A
1	36466043	36483278	CSF3R
1	43337818	43354466	MPL
1	44819844	44843253	PTCH2
1	47216290	47232225	TAL1
1	47250139	47314892	STIL
1	50960745	50974634	CDKN2C
1	64833223	65067754	JAK1
1	92473043	92486925	GFI1
1	110338506	110346681	RBM15
1	114704469	114716771	NRAS
1	119911553	120100779	NOTCH2
1	147541501	147626216	BCL9
1	150560895	150579738	MCL1
1	151060397	151069544	MLLT11
1	154974653	154979251	CKS1B
1	156463727	156500779	MEF2D
1	156815636	156881850	NTRK1
1	164555584	164899296	PBX1
1	179099330	179229684	ABL2
1	202331544	202341984	UBE2T
1	204516379	204558120	MDM4
2	264140	278283	ACP1
2	15940550	15947007	MYCN
2	25227855	25342590	DNMT3A
2	25733753	25878487	ASXL2
2	29192774	29921586	ALK
2	47403067	47663146	MSH2
2	47695530	47810063	MSH6
2	58159243	58241410	FANCL
2	60450520	60554467	BCL11A
2	60881491	60931612	REL
2	61476032	61538741	XPO1
2	73984910	74108176	TET3
2	88857361	90235368	IGK
2	99545419	100192428	AFF3
2	120735623	120992653	GLI2
2	136114349	136119177	CXCR4
2	176092721	176095944	HOXD13
2	176104216	176109754	HOXD11
2	197388515	197435079	SF3B1
2	208236229	208266074	IDH1
2	211375717	212538841	ERBB4
2	212999691	213152427	IKZF2
2	219289623	219309648	PTPRN
2	222199887	222298998	PAX3
2	236567787	236582354	ACKR3
3	10026370	10101932	FANCD2
3	36993350	37050846	MLH1
3	38138478	38143024	MYD88
3	41194741	41260096	CTNNB1
3	47016428	47164113	SETD2
3	48157146	48188417	CDC25A
3	48446710	48467645	ATRIP
3	59747277	61251459	FHIT
3	70954693	71583978	FOXP1
3	101827991	101861022	NFKBIZ
3	112463966	112499472	BTLA
3	128479427	128493201	GATA2
3	128619969	128681075	RPN1
3	158571163	158607252	MLF1
3	169083499	169663775	MECOM
3	169083499	169663775	MECOM
3	172505508	172523475	TNFSF10
3	187721377	187745725	BCL6
3	189631389	189897276	TP63
4	1793293	1808872	FGFR3
4	1871393	1982207	NSD2
4	53377569	53464382	FIP1L1
4	54009789	54064605	CHIC2
4	54229280	54298245	PDGFRA
4	54657267	54740783	KIT
4	86935002	87141039	AFF1
4	102501330	102617302	NFKB1
4	105145875	105279816	TET2
4	108047545	108168956	LEF1
4	122451470	122456725	IL2
4	152320544	152536092	FBXW7
4	190173774	190185942	DUX4
5	1253147	1295068	TERT
5	36876769	37066413	NIPBL
5	68215740	68301821	PIK3R1
5	76716126	76735770	F2R
5	88717117	88904257	MEF2C
5	112707498	112846239	APC
5	132060655	132063204	IL3
5	132875395	132963634	AFF4
5	134114681	134151865	TCF7
5	138465479	138469303	EGR1
5	138553756	138575675	HSPA9
5	138610967	138935034	CTNNA1
5	150053291	150113372	CSF1R
5	150113839	150155872	PDGFRB
5	150442635	150449739	RPS14
5	158695916	159099916	EBF1
5	171309248	171312139	TLX3
5	171387116	171411810	NPM1
5	173232109	173235311	NKX2-5
5	177131830	177300213	NSD1
6	291630	351355	DUSP22
6	391739	411443	IRF4
6	15246069	15522042	JARID2
6	18223860	18264548	DEK
6	26087281	26098343	HFE
6	29941260	29949572	HLA-A
6	31268749	31272130	HLA-C
6	31353872	31367067	HLA-B
6	32194843	32224067	NOTCH4
6	35452338	35467104	FANCE
6	41934934	42050357	CCND3
6	44258166	44265788	NFKBIE
6	45328157	45664349	RUNX2
6	89829894	89874436	CASP8AP2
6	108559835	108684774	FOXO3
6	135181308	135219173	MYB
6	137867214	137883314	TNFAIP3
6	167826893	167972023	AFDN
7	5970925	6009130	PMS2
7	6104949	6161564	USP42
7	27162438	27175180	HOXA9
7	27170605	27180261	HOXA10
7	27181157	27185232	HOXA11
7	27193503	27200091	HOXA13
7	38240024	38368055	TRG
7	41960949	42264100	GLI3
7	50304068	50405101	IKZF1
7	55019017	55211628	EGFR
7	74027789	74069907	ELN
7	92604921	92836573	CDK6
7	93099513	93118023	SAMD9
7	93130056	93148385	SAMD9L
7	101815904	102283958	CUX1
7	104940943	105115019	KMT2E
7	107800000	127500000	7q31
7	117287120	117715971	CFTR
7	140719327	140924929	BRAF
7	142299011	142813287	TRB
7	148697914	148801110	CUL1
7	148807257	148884321	EZH2
7	152134922	152436644	KMT2C
7	152644776	152676193	XRCC2
7	156994051	157010663	MNX1
8	17922842	18029948	PCM1
8	27284886	27311272	TRIM35
8	27311482	27459391	PTK2B
8	38269704	38382272	NSD3
8	38400215	38468834	FGFR1
8	41929479	42051994	KAT6A
8	47736913	47738164	CEBPD
8	56160909	56211324	PLAG1
8	60678740	60868028	CHD7
8	70109782	70403808	NCOA2
8	89924515	90003228	NBN
8	91954972	92103286	RUNX1T1
8	103140713	103230305	BAALC
8	115408496	115809673	TRPS1
8	116845934	116874776	RAD21
8	127735434	127742951	MYC
8	127794526	128187101	PVT1
8	143419182	143430732	MAFA
9	4984390	5129948	JAK2
9	8314246	10613002	PTPRD
9	20341669	20622499	MLLT3
9	21967752	21995301	CDKN2A
9	22002903	22009305	CDKN2B
9	35073835	35080004	FANCG
9	36833269	37034268	PAX5
9	84668375	85095751	NTRK2
9	90801787	90898549	SYK
9	95099054	95426796	FANCC
9	95442980	95517057	PTCH1
9	105662457	105663124	TAL2
9	128683424	128696400	SET
9	130713043	130887675	ABL1
9	131125573	131234663	NUP214
9	133414358	133459402	ADAMTS13
9	136494433	136546048	NOTCH1
9	136881912	136926607	TRAF2
10	8045378	8075198	GATA3
10	21524646	21743630	MLLT10
10	43077064	43130351	RET
10	68560337	68694487	TET1
10	87862563	87971930	PTEN
10	101131300	101137789	TLX1
10	102394110	102402524	NFKB2
10	103087185	103277605	NT5C2
11	532242	537321	HRAS
11	3671083	3797792	NUP98
11	8224309	8268716	LMO1
11	22622533	22625823	FANCF
11	32387775	32435564	WT1
11	33858576	33892076	LMO2
11	33858576	33892076	LMO2
11	36510372	36593156	RAG1
11	36575574	36598279	RAG2
11	47354860	47378547	SPI1
11	64764606	64778786	SF1
11	64803510	64811294	MEN1
11	68903863	68940602	IGHMBP2
11	69294151	69341682	MYEOV
11	69641156	69654474	CCND1
11	72002864	72080693	NUMA1
11	73218281	73242427	P2RY2
11	85957175	86069882	PICALM
11	86201212	86278813	EED
11	94415570	94493885	MRE11
11	102317450	102339403	BIRC3
11	102347211	102378670	BIRC2
11	108223044	108369102	ATM
11	108665058	108940999	DDX10
11	111352255	111455630	POU2AF1
11	114059041	114256765	ZBTB16
11	118436456	118526832	KMT2A
11	119093874	119095465	H2AX
11	119206298	119313926	CBL
12	280057	389320	KDM5A
12	4269771	4305353	CCND2
12	6570082	6614524	CHD4
12	6666477	6689572	ZNF384
12	8602155	8613242	AICDA
12	11649674	11895377	ETV6
12	12685498	12722369	CDKN1B
12	16548372	16610594	LMO3
12	25205246	25250936	KRAS
12	49018975	49060794	KMT2D
12	53938831	53946544	HOXC13
12	53973126	53977643	HOXC11
12	56076799	56103505	ERBB3
12	57095408	57132139	STAT6
12	57459785	57472268	GLI1
12	57747727	57756013	CDK4
12	65824460	65966291	HMGA2
12	68808177	68845544	MDM2
12	92140278	92145846	BTG1
12	111405923	111451623	SH2B3
12	112418351	112509918	PTPN11
12	121804009	121832656	SETD1B
13	27960918	27969315	CDX2
13	28003274	28100592	FLT3
13	32315086	32400268	BRCA2
13	42040036	42256578	DGKH
13	48303744	48599436	RB1
13	49956670	50125720	DLEU2
13	50048973	50049061	MIR16-1
13	50049119	50049201	MIR15A
13	50082169	50906856	DLEU1
14	21621904	22552132	TRA
14	22422546	22466577	TRD
14	23117036	23120256	CEBPE
14	36516392	36521149	NKX2-1
14	45135930	45200890	FANCM
14	92923150	92935285	CHGA
14	95086228	95158010	DICER1
14	95650498	95679833	TCL6
14	95709947	95714196	TCL1A
14	99169287	99272197	BCL11B
14	102777449	102911500	TRAF3
14	104769349	104795751	AKT1
14	105586437	106879844	IGH
15	33310962	33866121	RYR3
15	34343315	34357737	NUTM1
15	40694774	40732340	RAD51
15	41621134	41773081	MGA
15	73994673	74047827	PML
15	87859751	88256791	NTRK3
15	89243945	89317261	FANCI
15	90083045	90102477	IDH2
15	90717346	90816166	BLM
16	3581181	3611606	SLX4
16	3725054	3880713	CREBBP
16	4314761	4339597	GLIS2
16	13920138	13952348	ERCC4
16	15703135	15857028	MYH11
16	23603160	23641321	PALB2
16	28931965	28939342	CD19
16	30957754	30984664	SETD1A
16	31180138	31191605	FUS
16	50742050	50801935	CYLD
16	67028984	67101058	CBFB
16	67562467	67639177	CTCF
16	68737292	68835537	CDH1
16	74621399	74666877	RFWD3
16	79585843	79600737	MAF
16	88874858	88977207	CBFA2T3
16	89726683	89816977	FANCA
17	5116032	5175034	USP6
17	5282265	5386340	RABEP1
17	7661779	7687538	TP53
17	31094927	31382116	NF1
17	31937007	32001038	SUZ12
17	38705273	38729795	MLLT6
17	39687914	39730426	ERBB2
17	39757718	39864312	IKZF3
17	40309180	40357643	RARA
17	40388525	40417896	TOP2A
17	42199176	42288633	STAT5B
17	42287547	42311943	STAT5A
17	42313324	42388540	STAT3
17	43044295	43170245	BRCA1
17	46029916	46225389	KANSL1
17	48997385	49056145	IGF2BP1
17	55264960	55325187	HLF
17	57255851	57684689	MSI2
17	58692573	58735611	RAD51C
17	61679139	61863559	BRIP1
17	72121020	72126416	SOX9
17	76734115	76737333	SRSF2
17	81539885	81553961	FAAP100
18	12785478	12929643	PTPN2
18	25061924	25352190	ZNF521
18	26016253	26091217	SS18
18	44680173	45068510	SETBP1
18	55222185	55664787	TCF4
18	58671465	58754477	MALT1
18	63123346	63320128	BCL2
19	1609291	1652615	TCF3
19	6210381	6279975	MLLT1
19	10133342	10231286	DNMT1
19	10350533	10380608	TYK2
19	10960932	11079426	SMARCA4
19	11377207	11384342	EPOR
19	12796820	12801800	PRDX2
19	12938578	12944489	CALR
19	13099033	13103161	LYL1
19	17824780	17848071	JAK3
19	18442663	18522116	ELL
19	18572220	18607741	CRLF1
19	23304991	23395471	ZNF91
19	33299934	33302534	CEBPA
19	33373685	33382686	CEBPG
19	35319261	35347361	CD22
19	38433691	38595273	RYR1
19	41877279	41881372	CD79A
19	42086110	42196585	POU2F2
19	45349837	45370918	ERCC2
19	55654146	55674716	U2AF2
19	56661980	56671783	ZNF835
20	21511017	21514064	NKX2-2
20	32358330	32439319	ASXL1
20	32762385	32809359	DNMT3B
20	39000000	43100000	20q12
20	40685848	40689236	MAFB
20	41028822	41124487	TOP1
20	50190830	50192668	CEBPB
20	58839718	58911192	GNAS
21	29194071	29630751	BACH1
21	33025935	33029196	OLIG2
21	34787801	36004667	RUNX1
21	38380027	38661780	ERG
21	38805183	38824955	ETS2
21	41464300	41531116	TMPRSS2
21	43092956	43107570	U2AF1
22	20394115	20408461	ZNF74
22	21759657	21867680	MAPK1
22	22026076	22922913	IGL
22	23179704	23318037	BCR
22	23573125	23580302	IGLL1
22	23786931	23838009	SMARCB1
22	27748277	27801756	MN1
22	28687743	28742422	CHEK2
22	29268009	29300525	EWSR1
22	29603556	29698598	NF2
22	30331988	30356919	SF3A1
22	36281280	36388010	MYH9
22	37118666	37175118	IL2RB
22	40410281	40636719	MRTFA
22	41092592	41180077	EP300
22	49773283	49827873	BRD1
X	1187549	1212723	CRLF2
X	1268800	1310381	CSF2RA
X	1462581	1537185	P2RY8
X	14690388	14873255	FANCB
X	15790156	15830694	ZRSR2
X	40049815	40177329	BCOR
X	48786540	48794311	GATA1
X	65588377	65741931	MSN
X	71095851	71103532	FOXO4
X	71107404	71112108	IL2RG
X	71118543	71144103	MED12
X	101349338	101390796	BTK
X	123960212	124422664	STAG2
X	134373288	134428791	PHF6
